# Supplementary material for: Functional analysis of ARF1 from Cymbidium goeringii in IAA response during leaf development
Source: PeerJ. 2022 Mar 10;10:e13077. doi: 10.7717/peerj.13077 (PMC8918147; doi:10.7717/peerj.13077)
Supplement: Supplemental Information 2 [file peerj-10-13077-s002.xlsx]

## Sheet: Sheet1
Table S1 The sequences of CgARF1
Sequence type	Sequence
Nucleotide sequence	ATGGCTTTTGCTCCTCTTCATTCAACAAGCCAGATACTTGGTTCAGCAACACTCCATGGGAATCTGTTGTACAAGGAGCTCTGGCATGCTTGTGCAGGGCCGCTGGTTATGCTGCCTCGTCAATGTGAGCGAGTCTATTACTTTCCTCAAGGTCATATGGAACAGCTTGAGGCTTCAACTCACCAAGGACTTGATCAGCAGATGCCATTATTTGATCTTCCATCAAAGATCCTTTGCAGAGTAGTCAATGTTGAACTTCGAGCTGAGCCTGATACTGATGAGGTTTATGCACAGATTACTTTACAACCAGAACCTGATCAATGTGAAGTGACCAGTCCAGACTCTCCATTGCCAGAACCTGAAAGCTATATGGTTCATTCCTTTTGTAAAACGCTTACG…
amino acid sequence	MAFAPLHSTSQILGSATLHGNLLYKELWHACAGPLVMLPRQCERVYYFPQGHMEQLEASTHQGLDQQMPLFDLPSKILCRVVNVELRAEPDTDEVYAQITLQPEPDQCEVTSPDSPLPEPESYMVHSFCKTLTASDTSTHGGFSVLRRHADECLPPLNMSQHPPWQELIAKDLHGNEWHFRHIFRGQPRRHLLTTGWSVFVSSKRLVAGDAFIFMRGENGELRVGVRRLMRQLNNMPSSVISSHSMHLGVLATASHALSTRTLFSVFYKPRASCSQFIISVNKYLEARSQNLSVGMRFKMRFEGDEAPERRFSGTIIGIREKASSSWPDSVWRSLKIQWDEPSSISRPDSVSPWELEPIVVAPPLISQPTIRSKRARPPLQASPSLEFSSVLGSWKTQS…
