# Supplementary material for: Functional analysis of ARF1 from Cymbidium goeringii in IAA response during leaf development
Source: PeerJ journal article supplement (doi:10.7717/peerj.13077), 2022-03-10
Supplement: Supplementary_file_1.zip [file The raw data of Fig. 2.xlsx]

## Sheet: Sheet1
The raw statistical of Fig. 2A
0h	7.63387	0.57979	c
2h	16.6976	2.12025	a
4h	11.9098	1.28253	b
6h	8.46786	1.35987	c
12h	14.936	1.83663	a
24h	1.18549	0.07469	d
48h	1.0232	0.0287	d
The raw statistical of Fig. 2A
R	1.56375	0.27476	cd
P	0.94619	0.15602	d
L	4.08709	0.85341	b
F	2.36737	0.35744	a

## Sheet: Sheet2
The raw data of Fig. 2A
Target Name	Sample Name	Cт	AtActin	ΔCт	ΔCт 0	ΔΔCт	2 ΔΔCт	Average value	Standard deviation
CgARF1	R	28.8122	24.1763	4.63592	5.54259	-0.906679	1.87473	1.56375	0.27476	cd
	R	28.7715	23.7775	4.99393	5.54259	-0.548668	1.46273
	R	28.7834	23.6779	5.10558	5.54259	-0.437012	1.3538
	P	30.1313	24.6838	5.44744	5.54259	-0.0951519	1.06818	0.94619	0.15602	d
	P	30.7654	24.8464	5.91893	5.54259	0.376337	0.770391
	P	29.6877	24.1451	5.54259	5.54259	0	1
	L	29.5845	25.8115	3.77302	5.54259	-1.76958	3.40954	4.08709	0.85341	b
	L	28.8867	25.6791	3.20758	5.54259	-2.33501	5.04555
	L	28.7314	25.1172	3.61425	5.54259	-1.92834	3.80617
	F	28.3199	23.8114	4.50848	5.54259	-1.03411	2.04786	2.36737	0.35744	a
	F	28.2768	23.9364	4.34042	5.54259	-1.20217	2.30086
	F	28.6945	24.6132	4.08138	5.54259	-1.46121	2.7534
The raw data of Fig. 2B
Target Name	Sample Name/h	Cт	AtActin	ΔCт	ΔCт 0	ΔΔCт	2 ΔΔCт	Average value	Standard deviation
	0	26.8753	22.7442	4.13112	7.15174	-3.02062	8.11519	7.63387	0.57979	c
	0	26.8737	22.6848	4.18897	7.15174	-2.96277	7.79622
	0	26.9092	22.5628	4.34641	7.15174	-2.80534	6.99021
	2	26.7561	23.6757	3.08043	7.15174	-4.07131	16.8107	16.6976	2.12025	a
	2	26.85	23.9278	2.92223	7.15174	-4.22952	18.7591
	2	26.8714	23.5799	3.29147	7.15174	-3.86028	14.5231
	4	27.6624	24.102	3.56039	7.15174	-3.59135	12.0533	11.9098	1.28253	b
	4	27.5958	23.8448	3.751	7.15174	-3.40074	10.5615
	4	27.6243	24.1856	3.43865	7.15174	-3.71309	13.1145
	6	27.8034	23.9513	3.85208	7.15174	-3.29966	9.84686	8.46786	1.35987	c
	6	27.9025	23.8261	4.07642	7.15174	-3.07532	8.42876
	6	27.8803	23.5621	4.31825	7.15174	-2.83349	7.12796
	12	26.9399	23.8738	3.06609	7.15174	-4.08565	16.9787	14.936	1.83663	a
	12	26.9359	23.633	3.30289	7.15174	-3.84885	14.4086
	12	26.9396	23.5343	3.40534	7.15174	-3.7464	13.4208
	24	27.819	21.0122	6.80688	7.15174	-0.344862	1.27003	1.18549	0.07469	d
	24	27.8023	20.8622	6.94012	7.15174	-0.211622	1.15799
	24	27.915	20.9376	6.9774	7.15174	-0.174339	1.12845
	48	26.8551	19.7238	7.13126	7.15174	-0.0204811	1.0143	1.0232	0.0287	d
	48	26.9042	19.83	7.0741	7.15174	-0.0776405	1.05529
	48	26.7403	19.5885	7.15174	7.15174	0	1
