# Supplementary material for: Functional analysis of ARF1 from Cymbidium goeringii in IAA response during leaf development
Source: PeerJ journal article supplement (doi:10.7717/peerj.13077), 2022-03-10
Supplement: Supplementary_file_1.zip [file The raw data of Fig. 4.xlsx]

## Sheet: Sheet1
The raw statistical of Fig. 2A
0h	7.63387	0.57979	c
2h	16.6976	2.12025	a
4h	11.9098	1.28253	b
6h	8.46786	1.35987	c
12h	14.936	1.83663	a
24h	1.18549	0.07469	d
48h	1.0232	0.0287	d
The raw statistical of Fig. 2A
R	1.56375	0.27476	cd
P	0.94619	0.15602	d
L	4.08709	0.85341	b
F	2.36737	0.35744	a

## Sheet: Sheet2
The raw data of Fig. 4
Target Name	Sample Name	Cт	AtActin	ΔCт	ΔCт 0	ΔΔCт	2 ΔΔCт	Average value	Standard deviation
AT T1 ARF1-3	S1	24.2733	31.9397	-7.6665	3.73247	-11.399	2700.42	3262.31	741.766
AT T1 ARF1-3	S2	24.5153	32.7853	-8.27003	3.73247	-12.0025	4103.1
AT T1 ARF1-3	S3	24.6699	32.4801	-7.81028	3.73247	-11.5428	2983.42
AT T1 ARF1-4	S1	25.3692	32.9477	-7.57849	3.73247	-11.311	2540.61	2169.23	397.29
AT T1 ARF1-4	S2	24.7441	31.785	-7.04092	3.73247	-10.7734	1750.31
AT T1 ARF1-4	S3	24.7635	32.1453	-7.38177	3.73247	-11.1142	2216.77
AT T1 ARF1-7	S1	23.7304	31.9404	-8.21	3.73247	-11.9425	3935.89	4116.17	198.67
AT T1 ARF1-7	S2	23.6741	31.9372	-8.2631	3.73247	-11.9956	4083.43
AT T1 ARF1-7	S3	23.515	31.8625	-8.3474	3.73247	-12.0799	4329.17
AT T1 WT	S1	33.7459	29.8248	3.73247	3.73247	0	1	1	0
AT T1 WT	S2	33.8663	29.9524	3.73247	3.73247	0	1
AT T1 WT	S3	33.2997	29.9373	3.73247	3.73247	0	1
