# Supplementary material for: Functional analysis of ARF1 from Cymbidium goeringii in IAA response during leaf development
Source: PeerJ journal article supplement (doi:10.7717/peerj.13077), 2022-03-10
Supplement: Supplementary_file_1.zip [file The raw data of Fig. 5D-G.xlsx]

## Sheet: Sheet1
The raw data of Fig. 5D-G
Line	Number	AU(663.00nm)	AU(646.00nm)	AU(470.00nm)	Chl a mg/l	Chl b mg/l	Total Chl mg/l	Chl a mg/g	Chl b mg/g	Total Chl mg/g	Chl a/b
WT	1	.62255	.23478	.55411	6.9416	1.59469	8.5363	1.38832	0.318939	1.70726	4.35294
	2	.62243	.23394	.55263	6.9425	1.57839	8.52089	1.3885	0.315678	1.70418	4.39847
	3	.6217	.23416	.55195	6.93297	1.58649	8.51946	1.38659	0.317298	1.70389	4.37
	4	.64744	.24275	.56817	7.22311	1.62993	8.85305	1.44462	0.325987	1.77061	4.43154
	5	.64719	.24271	.56735	7.22017	1.63039	8.85056	1.44403	0.326077	1.77011	4.4285
	6	.64641	.24237	.56694	7.21161	1.62747	8.83907	1.44232	0.325493	1.76781	4.43119
	7	.65919	.25196	.57608	7.3407	1.75623	9.09693	1.46814	0.351246	1.81939	4.17981
	8	.65965	.25289	.57762	7.34371	1.77264	9.11634	1.46874	0.354527	1.82327	4.14282
	9	.65836	.25287	.57684	7.32801	1.77872	9.10673	1.4656	0.355744	1.82135	4.11982
	Average value	-	-	-	-	-	-	1.43299	0.332332	1.76532	4.31723
	Standard deviation	-	-	-	-	-	-	0.0354419	0.016611	0.0504482	0.13104
ARF1-3	1	.57412	.21402	.50347	6.40861	1.4204	7.82901	1.28172	0.28408	1.5658	4.51184
	2	.5738	.21373	.5035	6.40552	1.41617	7.82169	1.2811	0.283234	1.56434	4.52312
	3	.57387	.21395	.50328	6.40575	1.42025	7.826	1.28115	0.284049	1.5652	4.51031
	4	.57678	.21366	.49845	6.4421	1.39977	7.84187	1.28842	0.279954	1.56837	4.60225
	5	.5755	.21269	.49729	6.4292	1.38668	7.81588	1.28584	0.277337	1.56318	4.63638
	6	.57546	.21265	.49732	6.42882	1.38608	7.8149	1.28576	0.277216	1.56298	4.63813
	7	.56068	.20923	.49139	6.25797	1.39158	7.64955	1.25159	0.278316	1.52991	4.49702
	8	.56026	.20825	.49104	6.25559	1.37396	7.62956	1.25112	0.274793	1.52591	4.55295
	9	.55973	.20821	.49099	6.24923	1.37583	7.62506	1.24985	0.275165	1.52501	4.54217
	Average value	-	-	-	-	-	-	1.27295	0.279872	1.5523	4.55713
	Standard deviation	-	-	-	-	-	-	0.0167586	0.00354897	0.0191269	0.0549214
ARF1-4	1	0.58321	.21175	.49689	6.52598	1.32898	7.85496	1.3052	0.265796	1.57099	4.91051
	2	0.58287	.21246	.49652	6.51983	1.34498	7.86481	1.30397	0.268997	1.57296	4.84752
	3	0.58262	.21214	.49694	6.51768	1.3398	7.85748	1.30354	0.26796	1.5715	4.86467
	4	.56495	.21709	.51261	6.28802	1.52832	7.81634	1.2576	0.305665	1.56327	4.11432
	5	.56391	.2165	.51182	6.27698	1.52168	7.79865	1.2554	0.304336	1.55973	4.12504
	6	.56396	.21655	.51245	6.27745	1.52243	7.79988	1.25549	0.304487	1.55998	4.1233
	7	.56349	.21555	.5037	6.27452	1.50467	7.77918	1.2549	0.300933	1.55584	4.17004
	8	.56344	.21592	.50341	6.27287	1.51237	7.78523	1.25457	0.302473	1.55705	4.14772
	9	.56302	.21612	.50295	6.26718	1.51851	7.78568	1.25344	0.303701	1.55714	4.1272
	Average value	-	-	-	-	-	-	1.27157	0.291594	1.56316	4.38115
	Standard deviation	-	-	-	-	-	-	0.0245274	0.0180743	0.00685656	0.370529
ARF1-7	1	.60681	.22483	.53241	6.77738	1.47357	8.25095	1.35548	0.294715	1.65019	4.59928
	2	.60649	.22399	.53161	6.77583	1.45827	8.2341	1.35517	0.291655	1.64682	4.64647
	3	.60642	.22472	.53225	6.77292	1.47332	8.24625	1.35458	0.294664	1.64925	4.59705
	4	.56674	.20917	.49335	6.33213	1.35989	7.69202	1.26643	0.271978	1.5384	4.65635
	5	.56678	.20895	.49309	6.33323	1.35526	7.68849	1.26665	0.271052	1.5377	4.67308
	6	.56644	.2088	.4929	6.3295	1.35395	7.68346	1.2659	0.27079	1.53669	4.67484
	7	.53181	.1971	.46268	5.93955	1.29262	7.23217	1.18791	0.258524	1.44643	4.59497
	8	.5323	.19727	.46251	5.94505	1.29358	7.23863	1.18901	0.258715	1.44773	4.59583
	9	.53164	.19696	.46188	5.93787	1.29066	7.22852	1.18757	0.258131	1.4457	4.60066
	Average value	-	-	-	-	-	-	1.26985	0.278568	1.54432	4.6265
	Standard deviation	-	-	-	-	-	-	0.0723246	0.0134421	0.0876779	0.035368
