# Supplementary material for: Functional analysis of ARF1 from Cymbidium goeringii in IAA response during leaf development
Source: PeerJ journal article supplement (doi:10.7717/peerj.13077), 2022-03-10
Supplement: Supplementary_file_1.zip [file The raw data of Fig. 6C-E.xlsx]

## Sheet: Sheet1
The raw data of Fig. 6C-E
Line	Number	Number of rooting leaves	Measurement of leaf number	Rooting rate		Total number of roots	Measurement of leaf number	Average number of roots		Total length of roots/mm	Measurement of root number	Average length of roots/mm
MS-WT	1	3	10	0.3	c	2	5	0.4	c	7.33	3	2.44333	c
	2	4	10	0.4		3	5	0.6		8.466	3	2.822
	3	3	10	0.3		2	5	0.4		7.083	3	2.361
	4	3	10	0.3		3	5	0.6		7.036	3	2.34533
	5	2	10	0.2		1	5	0.2		6.942	3	2.314
	Average value	-	-	0.3		-	-	0.44		-	-	2.45713
	Standard deviation	-	-	0.0707107		-	-	0.167332		-	-	0.208878
MS-ARF1	1	4	10	0.4	c	2	5	0.4	c	17.291	3	5.76367	b
	2	3	10	0.3		3	5	0.6		14.953	3	4.98433
	3	5	10	0.5		3	5	0.6		11.724	3	3.908
	4	3	10	0.3		3	5	0.6		12.067	3	4.02233
	5	3	10	0.3		2	5	0.4		13.218	3	4.406
	Average value	-	-	0.36		-	-	0.52		-	-	4.61687
	Standard deviation	-	-	0.0894427		-	-	0.109545		-	-	0.764415
MS+0.2 mg/L IAA-WT	1	4	10	0.4	c	4	5	0.8	c	6.953	3	2.31767	c
	2	3	10	0.3		3	5	0.6		8.543	3	2.84767
	3	3	10	0.3		3	5	0.6		8.388	3	2.796
	4	2	10	0.2		4	5	0.8		7.43	3	2.47667
	5	4	10	0.4		3	5	0.6		9.361	3	3.12033
	Average value	-	-	0.32		-	-	0.68		-	-	2.71167
	Standard deviation	-	-	0.083666		-	-	0.109545		-	-	0.316512
MS+0.2 mg/L-ARF1	1	4	10	0.4	b	7	5	1.4	b	17.362	3	5.78733	a
	2	6	10	0.6		7	5	1.4		19.939	3	6.64633
	3	6	10	0.6		9	5	1.8		17.031	3	5.677
	4	5	10	0.5		5	5	1		18.113	3	6.03767
	5	5	10	0.5		6	5	1.2		14.135	3	4.71167
	Average value	-	-	0.52		-	-	1.36		-	-	5.772
	Standard deviation	-	-	0.083666		-	-	0.296648		-	-	0.703442
MS+0.5 mg/L-WT	1	6	10	0.6	b	12	5	2.4	a	8.934	3	2.978	c
	2	5	10	0.5		9	5	1.8		9.002	3	3.00067
	3	5	10	0.5		14	5	2.8		11.798	3	3.93267
	4	4	10	0.4		13	5	2.6		12.231	3	4.077
	5	5	10	0.5		10	5	2		5.864	3	1.95467
	Average value	-	-	0.5		-	-	2.32		-	-	3.1886
	Standard deviation	-	-	0.0707107		-	-	0.414729		-	-	0.859866
MS+0.5 mg/L-ARF1	1	8	10	0.8	a	11	5	2.2	a	19.409	3	6.46967	a
	2	6	10	0.6		13	5	2.6		17.387	3	5.79567
	3	7	10	0.7		14	5	2.8		15.52	3	5.17333
	4	8	10	0.8		13	5	2.6		15.493	3	5.16433
	5	5	10	0.5		12	5	2.4		14.724	3	4.908
	Average value	-	-	0.68		-	-	2.52		-	-	5.5022
	Standard deviation	-	-	0.130384		-	-	0.228035		-	-	0.633143
