# Supplementary material for: Functional analysis of ARF1 from Cymbidium goeringii in IAA response during leaf development
Source: PeerJ journal article supplement (doi:10.7717/peerj.13077), 2022-03-10
Supplement: Supplementary_file_1.zip [file The raw data of Fig. 7.xlsx]

## Sheet: Sheet1
The raw data of Fig. 7
Time	Line	ABA	GA3	BR	(ng/g.FW)
0h	WT	50.5275	3.71596	1.86291
		58.4045	3.46748	1.93735
		53.6126	3.18983	2.10983
	CgARF1	39.4279	1.69023	2.97441
		36.3523	1.85614	2.73125
		40.7478	1.60637	2.68135
12h	WT	96.9751	2.71599	3.10756
		110.142	2.91655	2.96073
		106.574	2.55509	3.33005
	CgARF1	74.0293	1.4598	2.75021
		68.1048	1.41015	2.72497
		77.692	1.29988	3.09327
24h	WT	109.9	3.12555	3.53572
		113.829	3.28204	4.12617
		98.4767	3.42538	3.92215
	CgARF1	107.514	1.502	3.71964
		101.55	1.67311	3.53572
		93.8341	1.63607	3.29949
48h	WT	86.895	2.78882	4.24189
		93.2182	3.08133	3.82395
		98.91	3.06881	4.03215
	CgARF1	79.0683	2.45816	4.02286
		91.1943	2.84038	3.67701
		89.4104	2.62361	3.71107
Time	Line	ABA		GA3		BR		(ng/g.FW)
		Average value	Standard deviation	Average value	Standard deviation	Average value	Standard deviation
0h	WT	54.18	3.96584	3.46	0.265141	1.97	0.127671	d
	CgARF1	38.8433	2.2579	1.72	0.127671	2.79333	0.155027	c
12h	WT	104.563	6.80562	2.73333	0.18037	3.13333	0.1861	c
	CgARF1	73.2733	4.83957	1.39	0.0818535	2.85333	0.205508	c
24h	WT	107.403	7.97375	3.28	0.15	3.86333	0.299054	ab
	CgARF1	100.963	6.85884	1.60333	0.0907377	3.52	0.210713	b
48h	WT	93.01	6.00775	2.98	0.164621	4.03	0.21	a
	CgARF1	86.5567	6.54444	2.64	0.190788	3.80333	0.188237	ab
